# Supplementary material for: Determinants of Antimicrobial Resistance among the Different European Countries: More than Human and Animal Antimicrobial Consumption
Source: Antibiotics (Basel). 2021 Jul 9;10(7):834. doi: 10.3390/antibiotics10070834 (PMC8300618; doi:10.3390/antibiotics10070834)
Supplement: Supplementary file 1 [file antibiotics-10-00834-s001.zip › antibiotics-1254449-SI.pdf]

## Supplementary Materials

**Table S1.** Correlation of rate of AMR with the remaining variables included in the study after adjustment for Expenditure on health, per capita, €.

|                                                                     | % Resistant                      |    |
|---------------------------------------------------------------------|----------------------------------|----|
|                                                                     | Partial correlation              | df |
| Prevalence of healthcare associated infections (HAI), %             | $r = 0.524$ ( $p = 0.120$ )      | 8  |
| Human antibiotic consumption at ambulatory care, DID                | $r = 0.793$ ( $p = 0.006^{**}$ ) | 8  |
| Human antibiotic consumption at hospital care, DID                  | $r = 0.100$ ( $p = 0.783$ )      | 8  |
| Human antibiotic consumption (total), DID                           | $r = 0.776$ ( $p = 0.008^{**}$ ) | 8  |
| Veterinary antibiotic overall sales, Tonnes                         | $r = 0.025$ ( $p = 0.946$ )      | 8  |
| Veterinary antibiotic sales for food-producing animals, Tonnes      | $r = 0.025$ ( $p = 0.946$ )      | 8  |
| Veterinary antibiotic sales population correction unit, 1000 Tonnes | $r = 0.128$ ( $p = 0.725$ )      | 8  |
| Total expenditure on health, % of GDP                               | $r = 0.076$ ( $p = 0.835$ )      | 8  |
| Government expenditure on health, % of GDP                          | $r = -0.152$ ( $p = 0.675$ )     | 8  |
| Years lost, /100,000 population, aged 75 years old                  | $r = -0.467$ ( $p = 0.174$ )     | 8  |

**Table S2.** Multiple linear regression model for AMR rate adjusting for polynomial relation with expenditure on health per capita.

| Block                                                                                               | Variables                                            | Unstandardized Co-Standardized |              | t      | p            |
|-----------------------------------------------------------------------------------------------------|------------------------------------------------------|--------------------------------|--------------|--------|--------------|
|                                                                                                     |                                                      | efficients                     | Coefficients |        |              |
|                                                                                                     |                                                      | B                              | Std. Error   | Beta   |              |
|                                                                                                     | (Constant)                                           | 7.454                          | 9.350        |        | 0.797 0.461  |
| Block 1 (enter method)                                                                              | Expenditure on health, per capita, €                 | -0.037                         | 0.014        | -3.649 | -2.569 0.050 |
|                                                                                                     | Squared Expenditure on health, per capita, €         | $4.837 \times 10^{-6}$         | 0.000        | 2.639  | 0.887 0.416  |
|                                                                                                     | Cubic Expenditure on health, per capita, €           | $2.825 \times 10^{-6}$         | 0.000        | 0.746  | 0.443 0.676  |
| Block 2 (stepwise)                                                                                  | Private Expenditure on health, %GDP                  | 19.694                         | 3.782        | 0.798  | 5.207 0.003  |
|                                                                                                     | Human antibiotic consumption at ambulatory care, DID | 0.984                          | 0.232        | 0.412  | 4.249 0.008  |
| Private Expenditure on health, %GDP = Expenditure on health, %GDP – Gov expenditure on health, %GDP |                                                      |                                |              |        |              |
| Dependent Variable: AMR rate;                                                                       |                                                      |                                |              |        |              |
| $R^2 = 0.986$ ; $R^2$ adj = 0.943                                                                   |                                                      |                                |              |        |              |

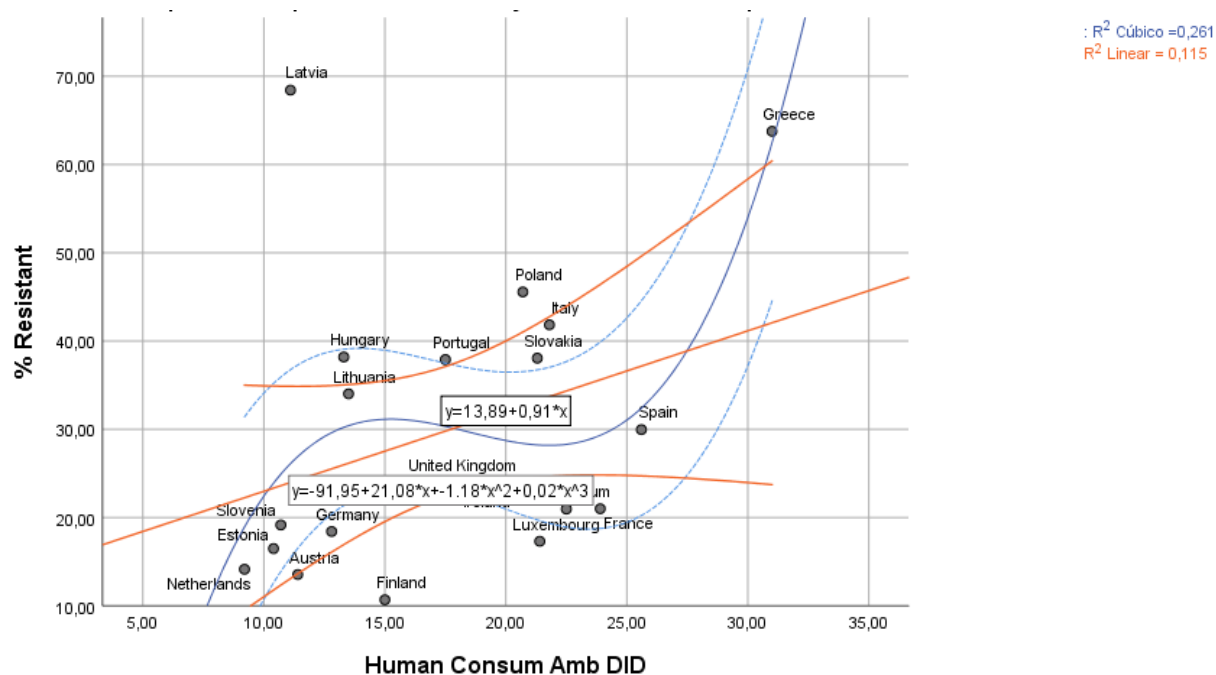

**Figure S1.** Scatterplot, linear and cubic regression models (95% confidence intervals) for the relation between percentual AMR rate with ambulatory antimicrobial consumption.

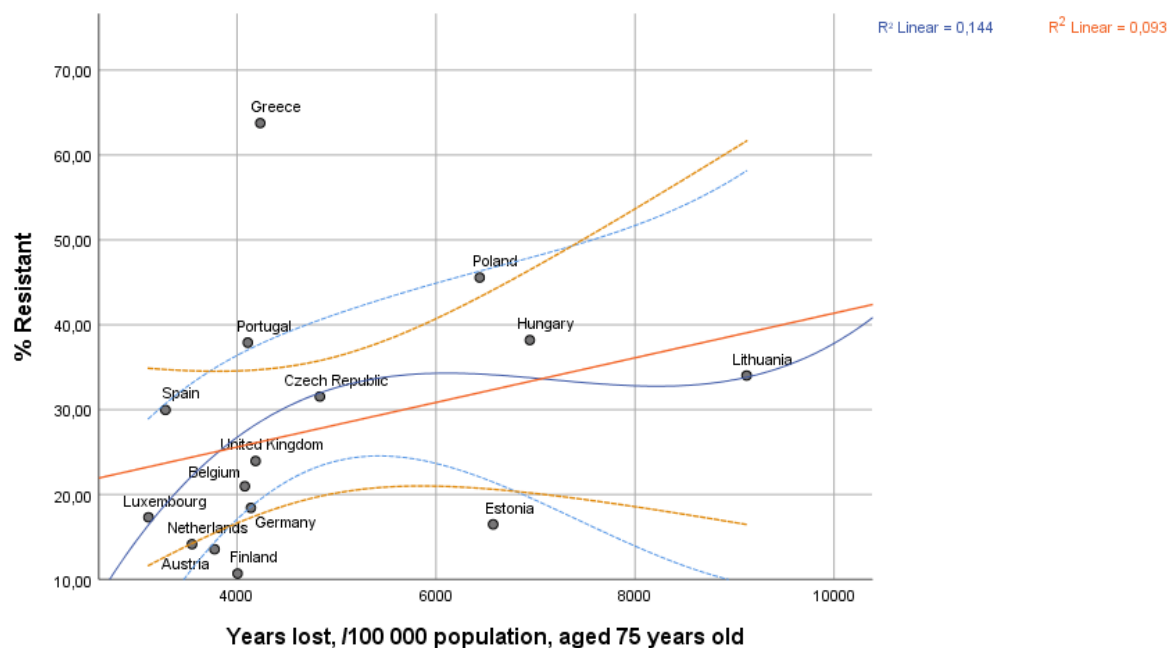

**Figure S2.** Scatterplot, linear and cubic regression models (95% confidence intervals) for the relation between percentual AMR rate with years of life lost rate per 100,000 inhabitants aged 75 years old or more.
